# Supplementary material
Source: publisher figshare collection journal article supplement (https://acs.figshare.com/ndownloader/files/22256547)
Supplement: Supplementary file 1 [file 22256547]

# HPHT annealing of Ni-containing nitrogen-rich synthetic diamonds and the formation of NE8 centre

Liangchao Chen, Weixia Shen, Chao Fang\*, Yuewen Zhang, Peiyang Mu, Guangtong

Zhou, Qianqian Wang, Zhuangfei Zhang\*, Xiaopeng Jia

Key Laboratory of Material Physics of Ministry of Education, School of Physics and  
Microelectronics, Zhengzhou University

**Corresponding Author:**\*Email: [fangchao1989@zzu.edu.cn](mailto:fangchao1989@zzu.edu.cn); [zhangzf@zzu.edu.cn](mailto:zhangzf@zzu.edu.cn).

The nitrogen concentrations in Table 2 are determined using the formula as follows:

The concentration of nitrogen only in the C-centre form ( $N_C$ ) in diamond can be calculated from the absorption coefficient  $\alpha_C/\text{cm}^{-1}$  of the peak at  $1130\text{ cm}^{-1}$ <sup>[1]</sup> to be

$$N_C/10^{-6} = 25 \alpha_C \quad (1)$$

The concentration of aggregated nitrogen only in the A-centre form ( $N_A$ ) is determined by measuring the absorption coefficient  $\alpha_A/\text{cm}^{-1}$  of the peak at  $1282\text{ cm}^{-1}$ <sup>[2]</sup> to be

$$N_A/10^{-6} = 16.5 \alpha_A \quad (2)$$

On the assumption that spectra are linearly overlapped, the concentration of A-centres and C-centres in mixed type of diamond IaA+Ib is still determined by the absorption coefficients  $\alpha_C$  and  $\alpha_A$  which are expressed in the terms of  $\alpha_{1130}$  and  $\alpha_{1282}$ <sup>[3]</sup> to be

$$\alpha_C = 1.1 \alpha_{1130} - 0.2 \alpha_{1282} \quad (3)$$

$$\alpha_A = 1.1 \alpha_{1282} - 0.2 \alpha_{1130} \quad (4)$$

where  $\alpha_{1130}$  and  $\alpha_{1282}$  are absorption coefficients of the peaks at  $1130\text{ cm}^{-1}$  and  $1282\text{ cm}^{-1}$ , respectively. The absorption coefficient of the peak at  $2000\text{ cm}^{-1}$  is well known to be  $12.3\text{ cm}^{-1}$ , so  $\alpha_{1130}$  and  $\alpha_{1282}$  can be obtained by comparing their absorption intensity ( $\mu$ ) with that of the peak at  $2000\text{ cm}^{-1}$  as follows:

$$\alpha_{1130} = \mu(1130 \text{ cm}^{-1})/\mu(2000 \text{ cm}^{-1}) \times 12.3 \quad (5)$$

$$\alpha_{1282} = \mu(1282 \text{ cm}^{-1})/\mu(2000 \text{ cm}^{-1}) \times 12.3 \quad (6)$$

The values of absorption intensity are calculated according to the recorded value A in IR spectra to be

$$\mu(1130 \text{ cm}^{-1}) = A(1130 \text{ cm}^{-1}) - A(1370 \text{ cm}^{-1}) \quad (7)$$

$$\mu(2000 \text{ cm}^{-1}) = A(2000 \text{ cm}^{-1}) - A(1370 \text{ cm}^{-1}) \quad (8)$$

$$\mu(1282 \text{ cm}^{-1}) = A(1282 \text{ cm}^{-1}) - A(1370 \text{ cm}^{-1}) \quad (9)$$

Using equations motioned above, NA and NC can be calculated. The calculated results with an uncertainty less than 5%.

## References

- [1] Kiflawi, I.; Mayer, A. E.; Spear, P. M.; Van Wyk, J. A.; Woods, G. S. Infrared absorption by the single nitrogen and A defect centres in diamond. *Philos. Mag. B.* **1994**, 69, 1141–1147.
- [2] Boyd, S. R.; Kiflawi, I.; Woods, G. S. Infrared absorption by the B nitrogen aggregate in diamond. *Phil. Mag. B.* **1995**, 72, 351–361.
- [3] Chepurov, A. A.; Dereppe, J. M.; Fedorov, I. I.; Chepurov, A. I. The change of Fe–Ni alloy inclusions in synthetic diamond crystals due to annealing. *Diamond Relat. Mater.* **2000**, 9, 1374–1379.
